# Supplementary material
Source: publisher figshare collection journal article supplement (https://sage.figshare.com/ndownloader/files/31540147)
Supplement: Supplementary file 1 [file 31540147]

**Supplementary material 6: The association (Odds Ratio (OR) and 95% Confidence Intervals) of Social Position and IBS, CFS and FM adjusted for sex and age**

Supplement material for Social Position and Functional Somatic Disorders bySigne U. Schovsbo, Thomas M. Dantoft, Betina H. Thuesen, Katja B. Leth-Møller, Lene F. Eplov, Marie W. Petersen, Torben Jørgensen, Merete Osler in Scandinavian Journal of Public Health.

|  | **IBS** | **FM** | **CFS** |
| --- | --- | --- | --- |
| OR (95 % CI) | OR (95 % CI) | OR (95 % CI) |
| **Cohabitation** | | | |
| Cohabitation | 1 (ref) | 1 (ref) | 1 (ref) |
| Non-cohabitation | 1.23 (0.95-1.59) | 1.08 (0.85 - 1.37) | *1.40 (1.19 – 1.66)* |
| **Vocational training** | | | |
| Skilled worker or <1 year of vocational training | 1 (ref) | 1 (ref) | 1 (ref) |
| <3 years of vocational training | 1.22 (0.92 - 1.63) | 0.84 (0.65 - 1.09) | 0.86 (0.70 - 1.06) |
| 3 - 4 years of vocational training | *0.68 (0.50 – 0.92)* | *0.55 (0.42 – 0.72)* | 0.83 (0.69 – 1.01) |
| > 4 years of vocational training | 0.76 (0.50 - 1.15) | *0.38 (0.23 - 0.63)* | *0.55 (0.41 - 0.74)* |
| **Employment** | | | |
| Employed | 1 (ref) | 1 (ref) | 1 (ref) |
| Unemployed | *2.05 (1.37 – 3.08)* | *3.65 (2.65 - 5.02)* | *4.35 (3.42 – 5.53)* |
| **Subjective Social Status** | | | |
| Highest | 1 (ref) | 1 (ref) | 1 (ref) |
| High | 1.01 (0.76 - 1.33) | *1.62 (1.22 – 2.16)* | *1.58 (1.29 – 1.95)* |
| Low | 1.38 (0.97 – 1.95) | *2.17 (1.54 - 3.05)* | *2.72 (2.14 - 3.46)* |
| Lowest | *1.95 (1.24 - 3.07)* | *5.64 (3.82 - 8.34)* | *6.32 (4.77 - 8.39)* |
